# Supplementary material
Source: HighWire-hosted journal article supplement (http://www.cmaj.ca/highwire/filestream/73099/field_highwire_adjunct_files/2/181712-res-3-at.pdf)

**Appendix 3 (as supplied by the authors): Cohort flow chart illustrating exclusions by fiscal year (FY), 1 April-31 March**

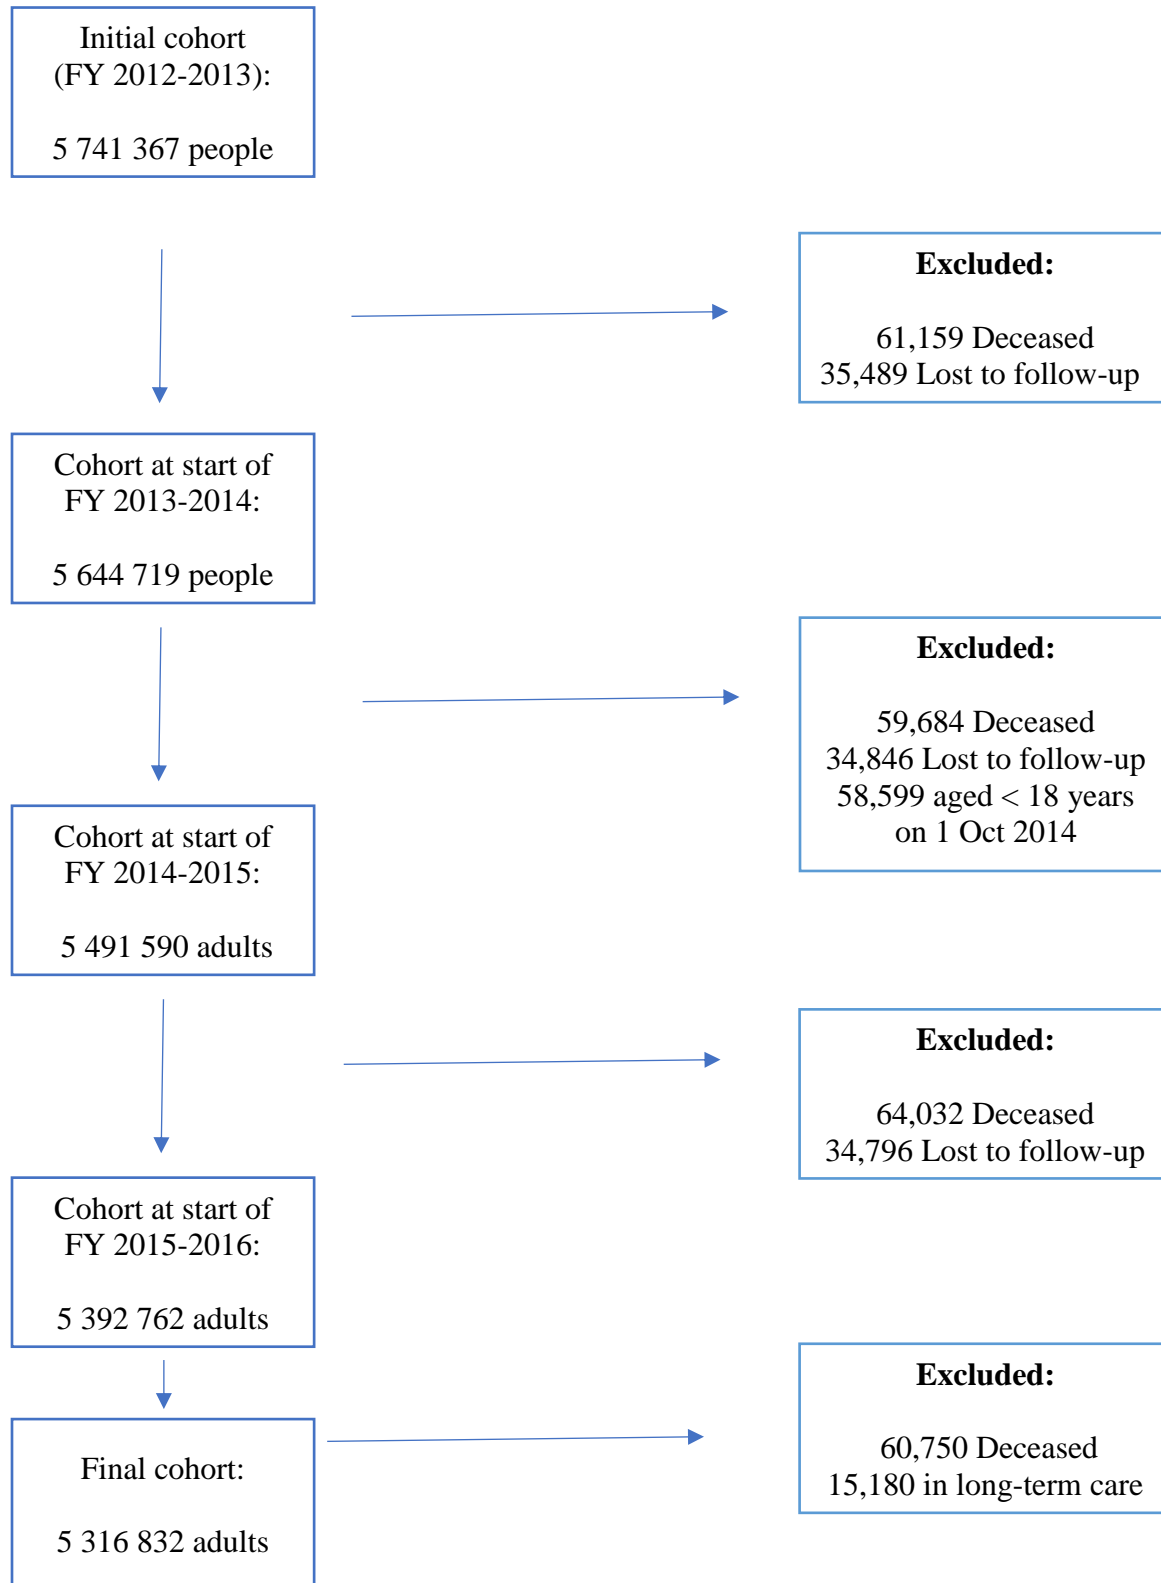

Supplement: 181712-res-3-at.pdf [file 181712-res-3-at.pdf]
